# Supplementary material for: Influence of pH on the Cytotoxic Activity of Organic Acids against Breast Cancer Cells
Source: Research Square preprint supplement (doi:10.21203/rs.3.rs-4409558/v1), 2024-05-24
Supplement: Supplementary file 1 [file ee13931b172998d707be1d6f.pdf]

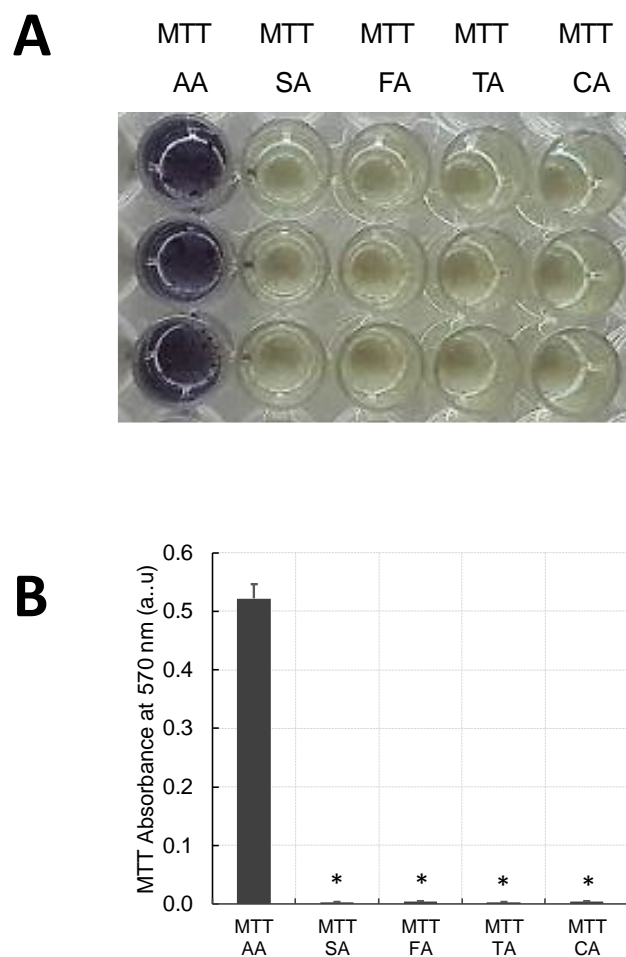

**Figure S1.** Organic acids were mixed with MTT solution. **A.** Images of MTT with organic acids, ascorbic acid (AA) – positive control, succinic acid (SA), fumaric acid (FA), tartaric acid (TA), and citric acid (CA). **B.** Absorbance of MTT with organic acids at 570 nm
